# Supplementary material for: Insights into the mechanism of enhanced methane low-temperature coupling conversion over zeolite-encaged Ni–Pt catalysts
Source: Royal Society of Chemistry journal article supplement (doi:10.1039/d5ta07525d), 2025-11-25
Supplement: d5ta07525d1.pdf [file d5ta07525d1.pdf]

## Supporting Information

### Insights into the mechanism of enhanced methane low-temperature coupling conversion over the zeolite-encaged Ni-Pt catalysts

Lunan Wu<sup>a</sup>, Xiu-Jie Yang<sup>a,\*</sup>, Jun Li<sup>b</sup>, Weichao Chou<sup>c</sup>, Bin Lou<sup>a,\*</sup>, Jing Wu<sup>d</sup>, Nan Shi<sup>a</sup>, Fushan Wen<sup>a</sup>, Dong Liu<sup>a,\*</sup>

<sup>a</sup> State Key Laboratory of Heavy Oil Processing, China University of Petroleum, Qingdao, Shandong 266580, China

<sup>b</sup> CNOOC Institute of Chemicals & Advanced Materials, Beijing 102200, China

<sup>c</sup> Dalian Institute of Chemical Physics, Chinese Academy of Sciences, Dalian 116023, China

<sup>d</sup> PetroChina Liaohe Petrochemical Company, Panjin, Liaoning, 124000, China

\* Corresponding authors.

E-mail Address: yangxiujie@upc.edu.cn (X. Yang), louloulove@163.com (B. Lou), liudong@upc.edu.cn (D. Liu)

## Experimental Section

### Chemicals

Chloroplatinic acid hexahydrate ( $\text{H}_2\text{PtCl}_6 \cdot 6\text{H}_2\text{O}$ , ~37.5 wt% Pt), colloidal silica (30 wt% in water), aluminum sulfate octadecahydrate ( $\text{Al}_2(\text{SO}_4)_3 \cdot 18\text{H}_2\text{O}$ ), ammonium chloride ( $\text{NH}_4\text{Cl}$ , 99.8%) and n-hexane ( $\text{C}_6\text{H}_{14}$ , 99%) were purchased from Macklin Biochemical Technology Ltd. Sodium hydroxide (NaOH, 99%), nickel nitrate hexahydrate ( $\text{Ni}(\text{NO}_3)_2 \cdot 6\text{H}_2\text{O}$ , 98%), ethanediamine (EDA, 99%) and tetrapropylammonium hydroxide solution (TPAOH, 25 wt% in water) were obtained from Sinopharm Chemical Reagent Ltd. All the chemical reagents were used without any further treatment.

### Characterization

X-ray diffraction (XRD) was detected using a Bruker D8 Advance X-ray diffractometer. Scanning electron microscope (SEM) images were recorded on a ZEISS MERLIN microscope. High-resolution transmission electron microscopy (HRTEM) and high-angle annular dark-field scanning transmission electron microscope (HAADF-STEM) images were taken on a Thermo

Scientific Talos F200X microscope. X-ray photoelectron spectroscopy (XPS) was measured on a Thermo Scientific K-alpha 250Xi spectrometer. Inductively coupled plasma-optical emission spectroscopy (ICP-OES) was tested on a Agilent 720ES spectrometer to analyze the chemical components of samples. The specific surface area, pore diameter and pore volumes of samples were calculated from nitrogen adsorption-desorption isotherms recorded on a ASAP 2020 micropore system. Hydrogen temperature programmed reduction ( $\text{H}_2$ -TPR), methane temperature programmed reaction ( $\text{CH}_4$ -TPR) and temperature-programmed desorption of ammonia ( $\text{NH}_3$ -TPD) were acquired on a Micromeritics AutoChem II 2920 chemisorption analyzer. Temperature-programmed desorption of methane ( $\text{CH}_4$ -TPD) was conducted on a VDsorb-91i chemisorption analyzer. The  $^{29}\text{Si}$  and  $^{27}\text{Al}$  MAS NMR spectra of zeolite samples were performed on a Bruker Advance III 500 MHz spectrometer at 59.57 and 78.13 MHz, respectively. CO pulse adsorption was conducted on a ChemStar automated chemisorption analyzer to ascertain the dispersity of metals on the zeolite. The UV-vis diffuse reflectance spectra (UV-vis DRS) of zeolites were recorded on a Shimadzu UV-2700 ultraviolet-visible spectrophotometer in the range of 200-800 nm. Thermal gravimetric analyses (TGA) of spent catalysts were performed on a STA 449 F5 simultaneous thermal analyzer from 25 to 800 °C in air. Raman spectra were conducted using a Thermo Scientific DXR Raman spectrometer.

Fourier transform infrared (FT-IR) spectra of pyridine adsorption were conducted on a Bruker Tensor 27 infrared spectrometer. The samples were degassed at 300 °C for 1 h under vacuum condition. Next, pyridine was injected into reaction tank for 30min after cooled to room temperature and then heated to 100 °C, respectively. FT-IR spectra of pyridine adsorption were recorded in the range 400-4000  $\text{cm}^{-1}$ . CO-diffuse reflectance infrared fourier transform spectra (CO-DRIFTS) were analyzed using a Nicolet iS50 infrared spectrometer. Typically, the catalysts were reduced in a flow of  $\text{H}_2$  (25 mL/min) at 300 °C for 1 h. and then cooled to 25 °C in pure He (40 mL/min). Next, 5%CO/He (50 mL/min) was introduced into the cell for 30 min. The spectra were recorded at the set time after scavenging with pure He (30 mL/min).

The electrochemical impedance spectra of the catalyst were carried out using the CHI 660E electrochemical workstation. The Pt electrode and the saturated Ag/AgCl electrode were used as counter electrode and reference electrode. The preparation method of the working electrode is as follows: Firstly, 10 mg catalysts, ethanol and 50  $\mu\text{L}$  0.5% Nafion solution are

mixed together and ultrasonic for 30 min. Then, the mixture is evenly spread on the ITO glass and dried at 60 °C to prepare the working electrode. The electrolyte solution was 0.2 M Na<sub>2</sub>SO<sub>4</sub> aqueous solution. Electrochemical impedance spectra were tested with the frequency range of 10000~ 0.01 Hz.

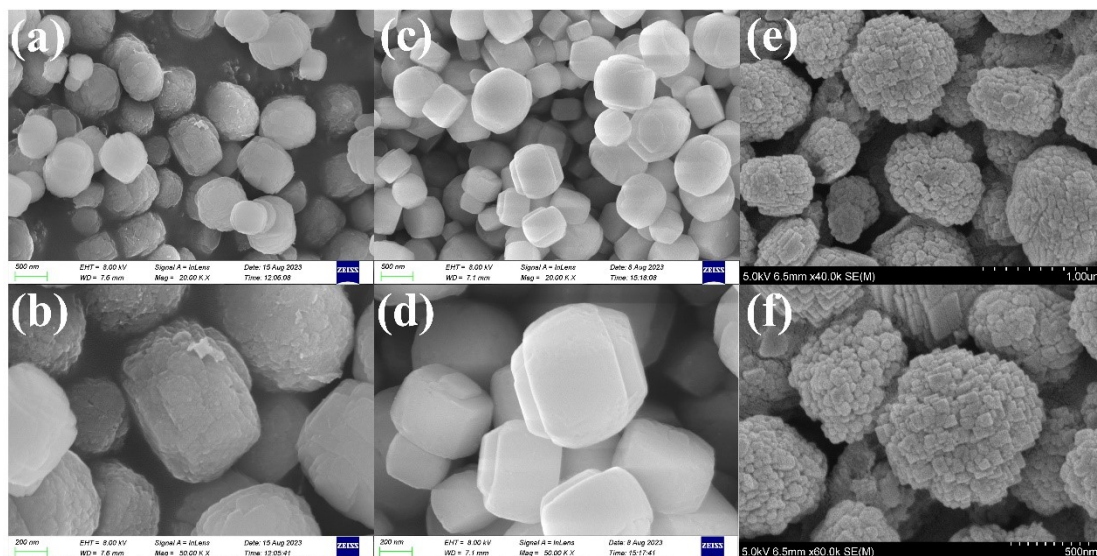

**Fig. S1** SEM images of (a-b)Ni-Pt@ZSM-5(100), (c-d)Ni-Pt@S-1 and (e-f)Ni-Pt/ZSM-5(25).

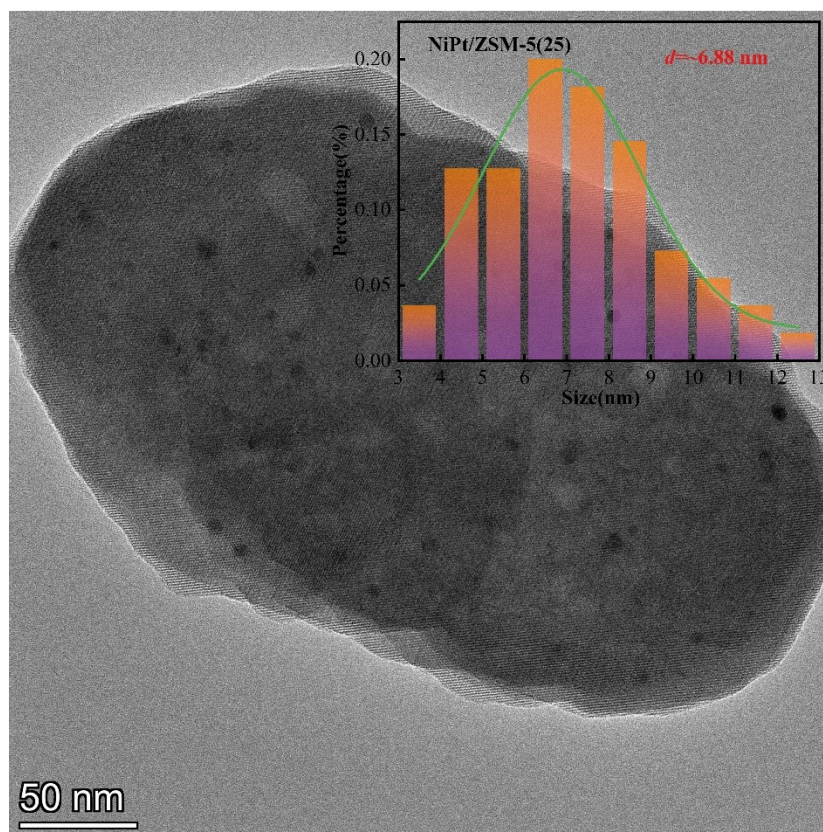

**Fig. S2** HRTEM image of Ni-Pt/ZSM-5(25).

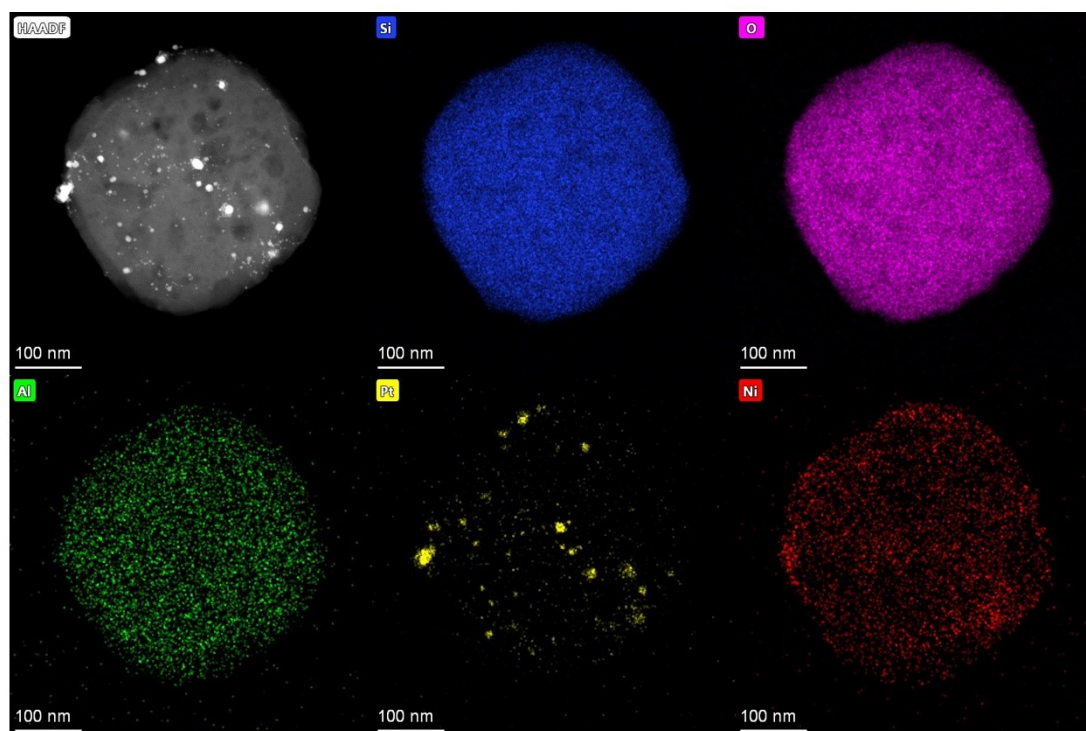

**Fig. S3** STEM images of Ni-Pt/ZSM-5(25).

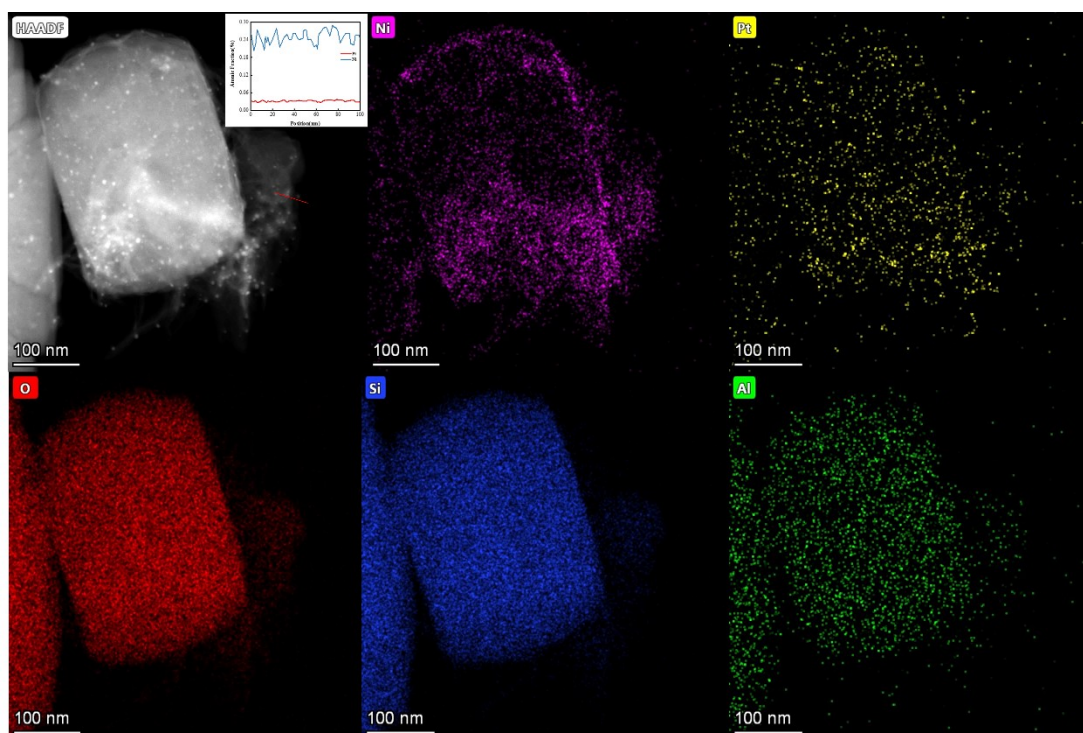

**Fig. S4** Tomographic STEM images and line-scan EDS of Ni-Pt@ZSM-5(25).



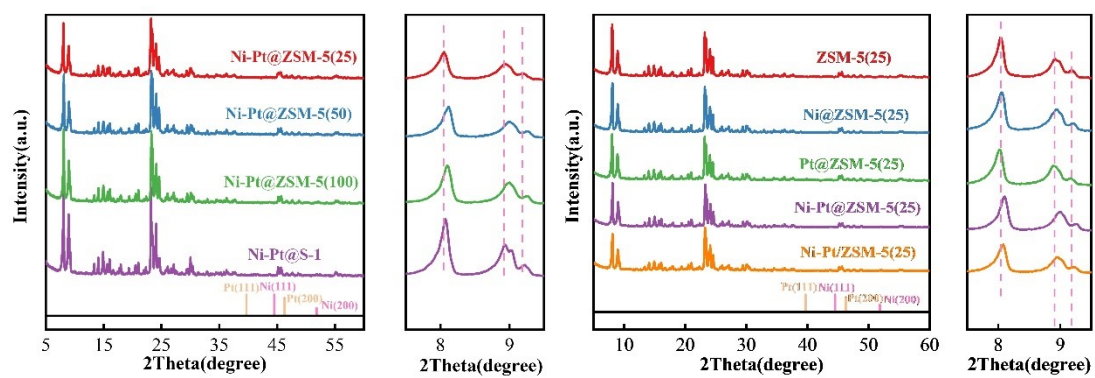

**Fig. S5** XRD patterns of as-prepared catalysts.

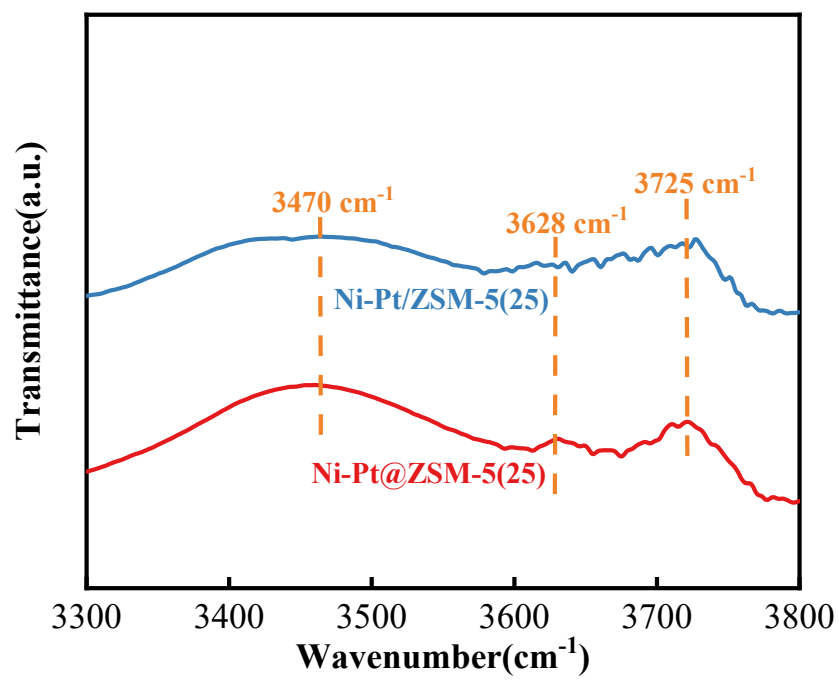

**Fig. S6** IR spectra of OH stretching vibrations region



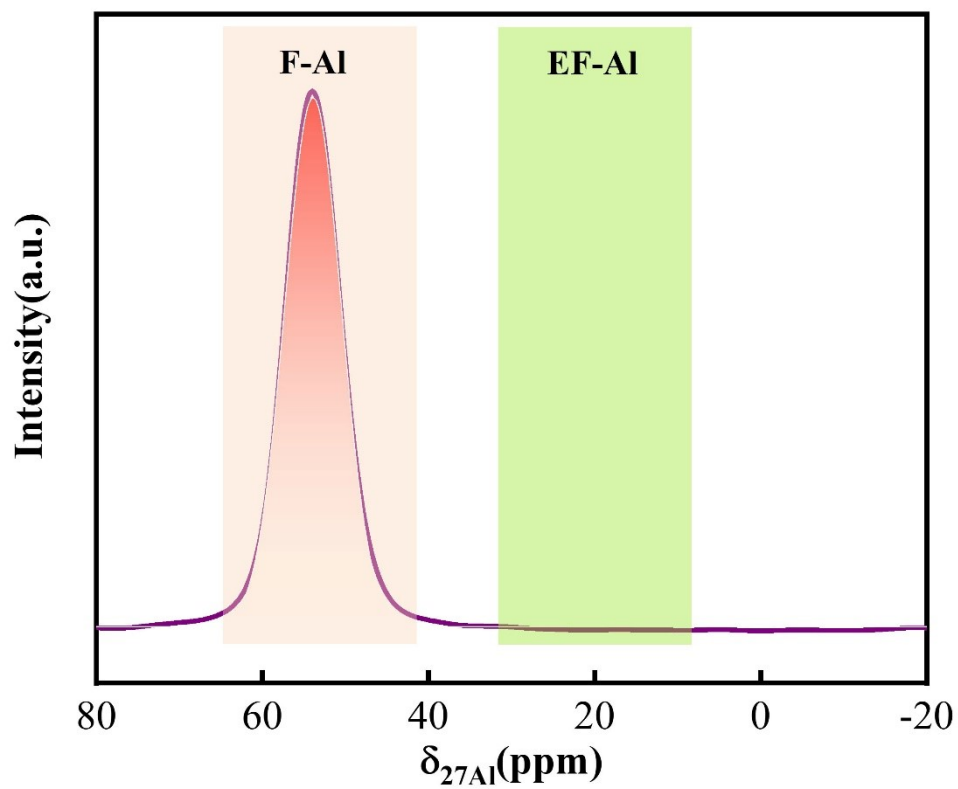

**Fig. S7**  $^{27}\text{Al}$  MAS NMR spectrum of Ni-Pt@ZSM-5(25)

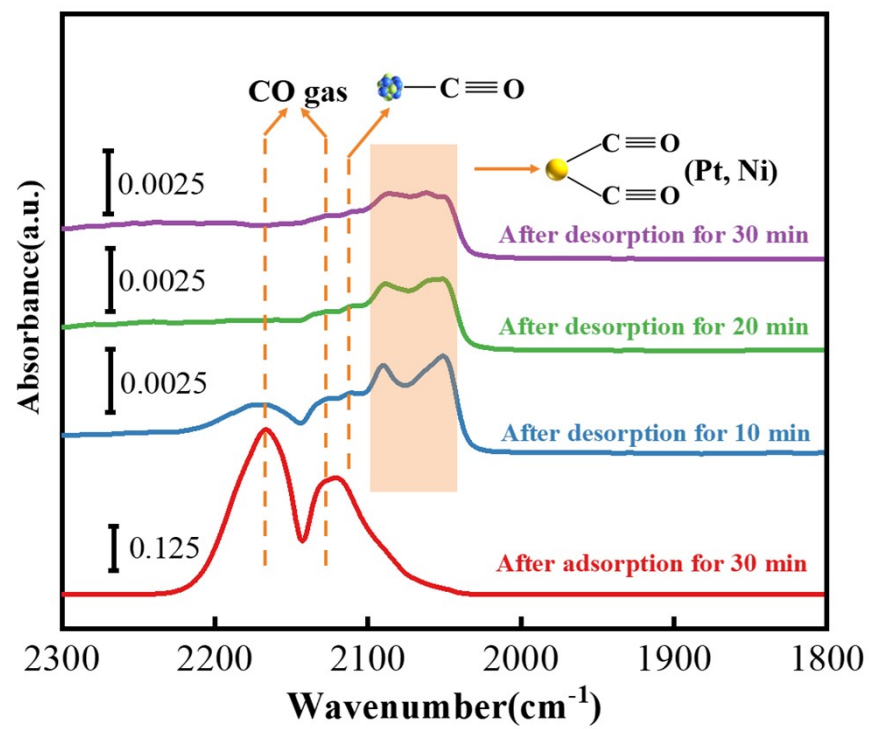

**Fig. S8** CO-diffuse reflectance infrared Fourier transform spectra of Ni-Pt/ZSM-5(25).

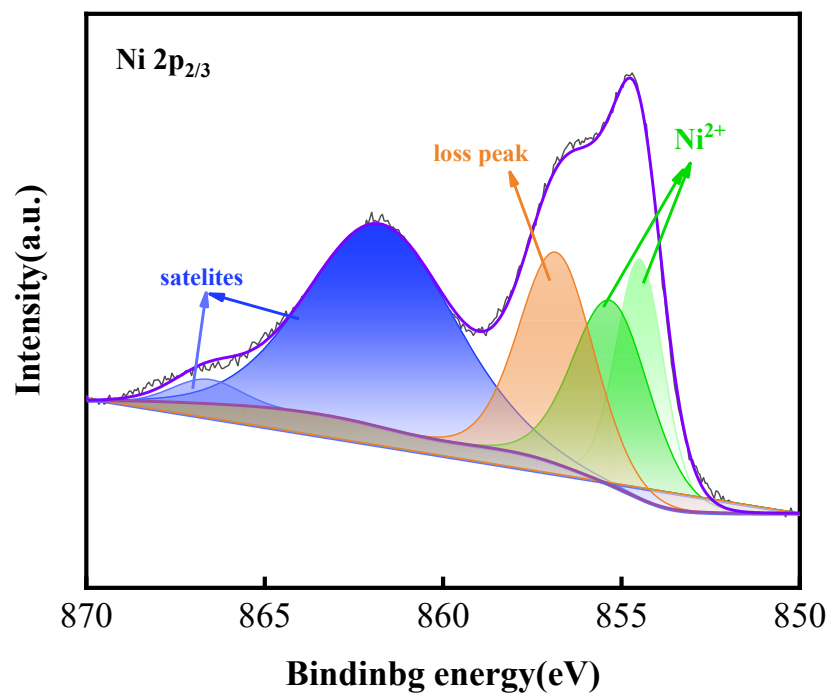

**Fig. S9** Ni 2p<sub>2/3</sub> spectrum of NiO.

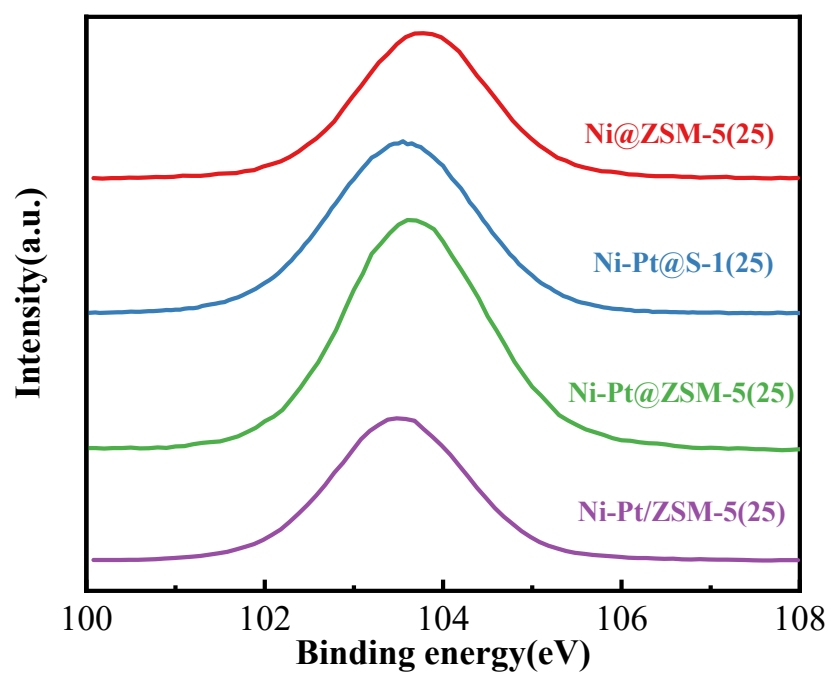

**Fig. S10** Si 2p spectra of as-prepared catalysts.

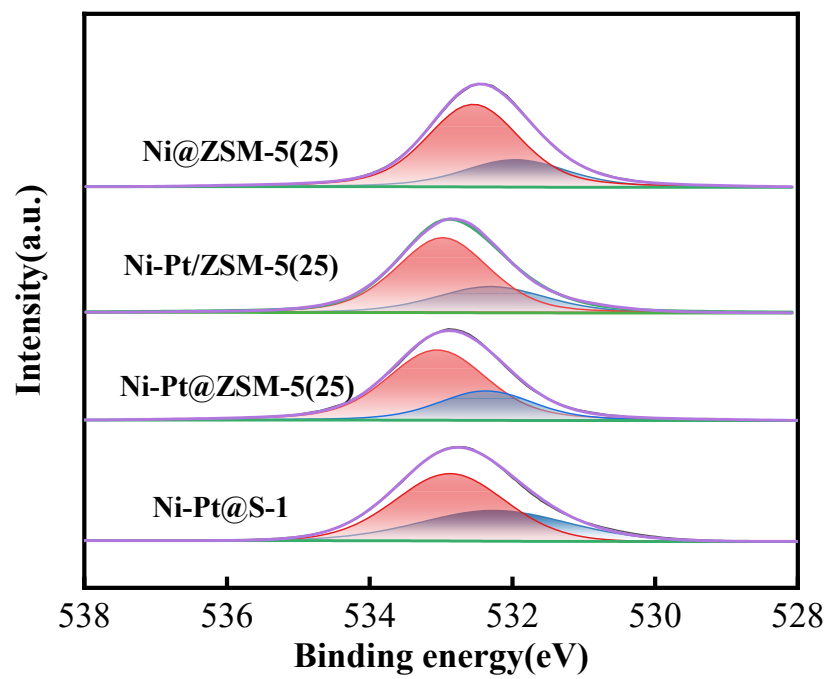

**Fig. S11** O 1s spectra of as-prepared catalysts.

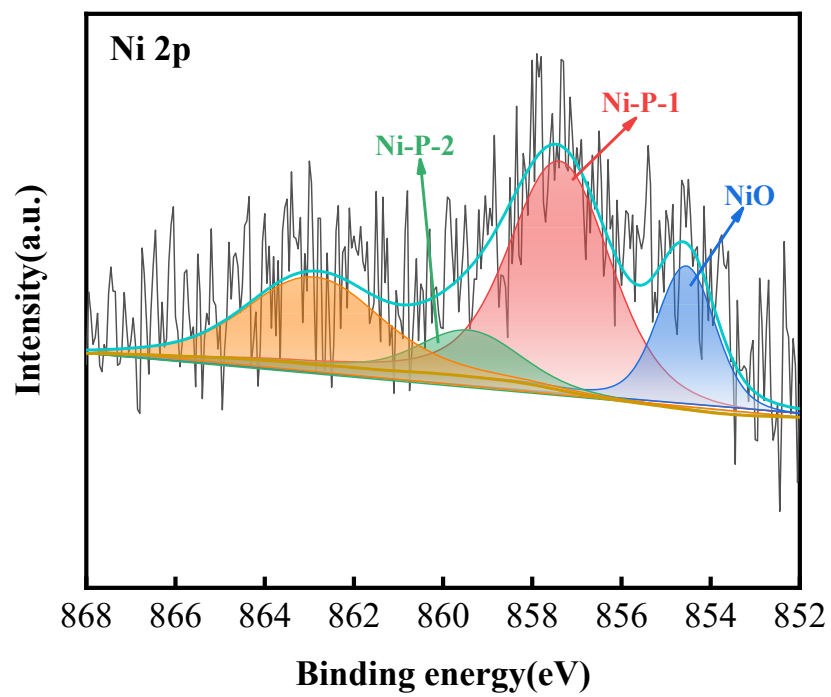

**Fig. S12** (a) Ni 2p spectra of Ni-Pt@ZSM-5(25) without reduction.

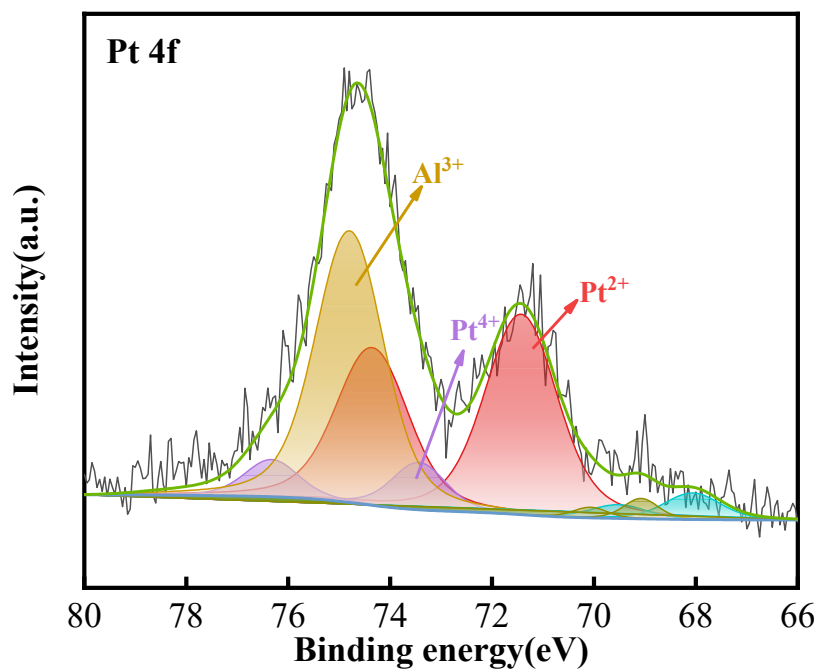

**Fig. S13** Pt 4f spectrum of Ni-Pt@ZSM-5(25) without reduction.

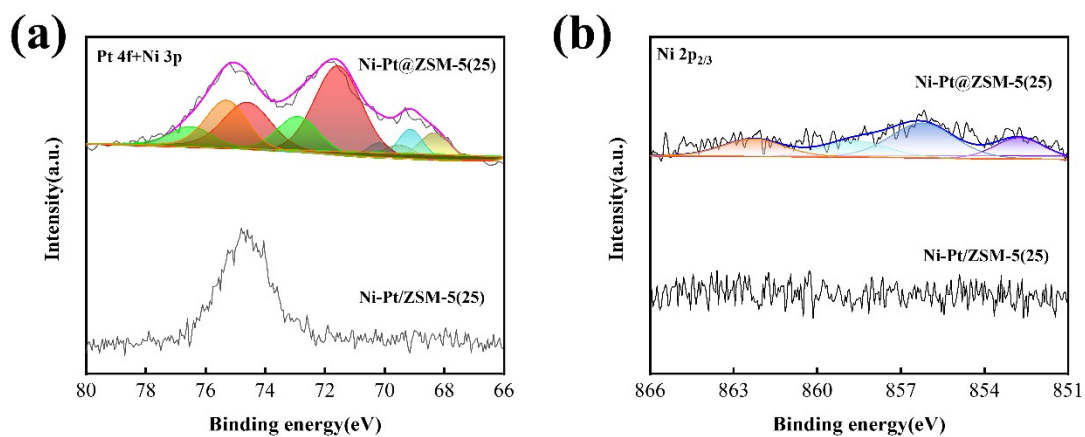

**Fig. S14** (a) Ni 2p and (b) Pt 4f spectra of Ni-Pt@ZSM-5(25) and Ni-Pt/ZSM-5 after depth profiling.



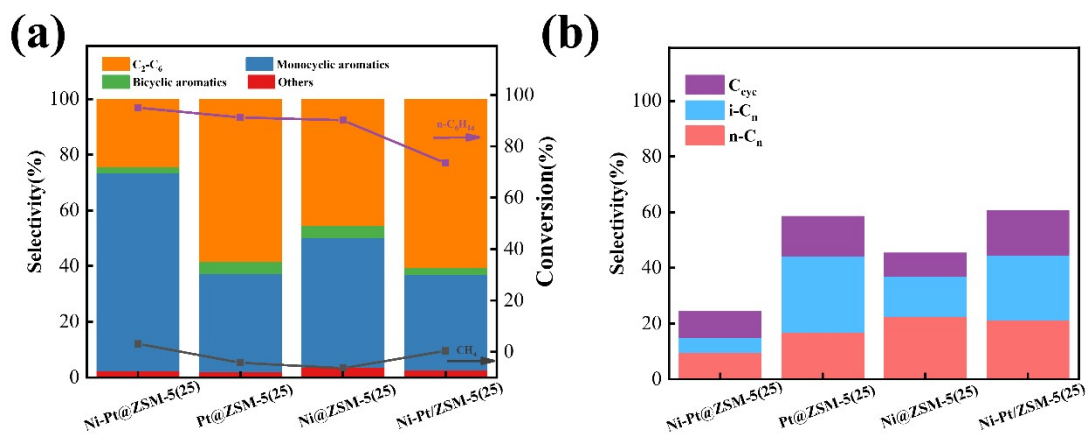

**Fig. S15** The co-aromatization performance of different catalysts at 400 °C. (a) The conversion of *n*-hexane and the detailed selectivity of C<sub>1</sub>-C<sub>6</sub>; (b) The selectivity of gas products. (Reaction conditions :  $m(\text{Catalysts})=0.2 \text{ g}$ ;  $p=1.0 \text{ MPa}$ ;  $m(n\text{-hexane})=15 \text{ g}$ ;  $t=60 \text{ min}$ ;  $T=400 \text{ }^{\circ}\text{C}$ ; C<sub>cyc</sub>—cycloalkanes; n-C<sub>n</sub>—n-alkanes; i-C<sub>n</sub>—iso- alkanes)

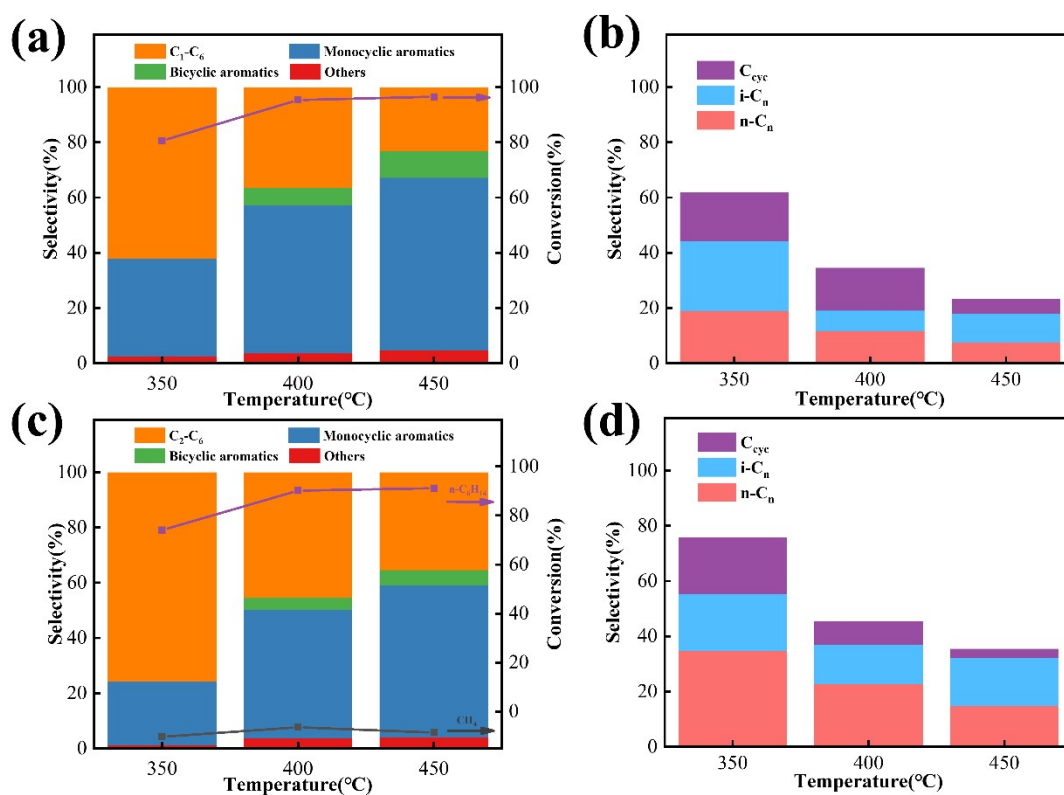

**Fig. S16** The conversion of *n*-hexane, the selectivity of total products and the detailed selectivity of C<sub>1</sub>-C<sub>6</sub> in the aromatization of *n*-hexane over Ni@ZSM-5(25) at different

temperature under different environment. (a-b) Nitrogen; (c-d) Methane. (Reaction conditions :  $m(\text{Catalysts})=0.2\text{ g}$ ;  $p=1.0\text{ MPa}$ ;  $m(n\text{-hexane})=15\text{ g}$ ;  $t=60\text{ min}$ ;  $C_{\text{cyc}}$ ——cycloalkanes;  $n\text{-C}_n$ ——n-alkanes;  $n\text{-C}_n$ ——iso- alkanes )

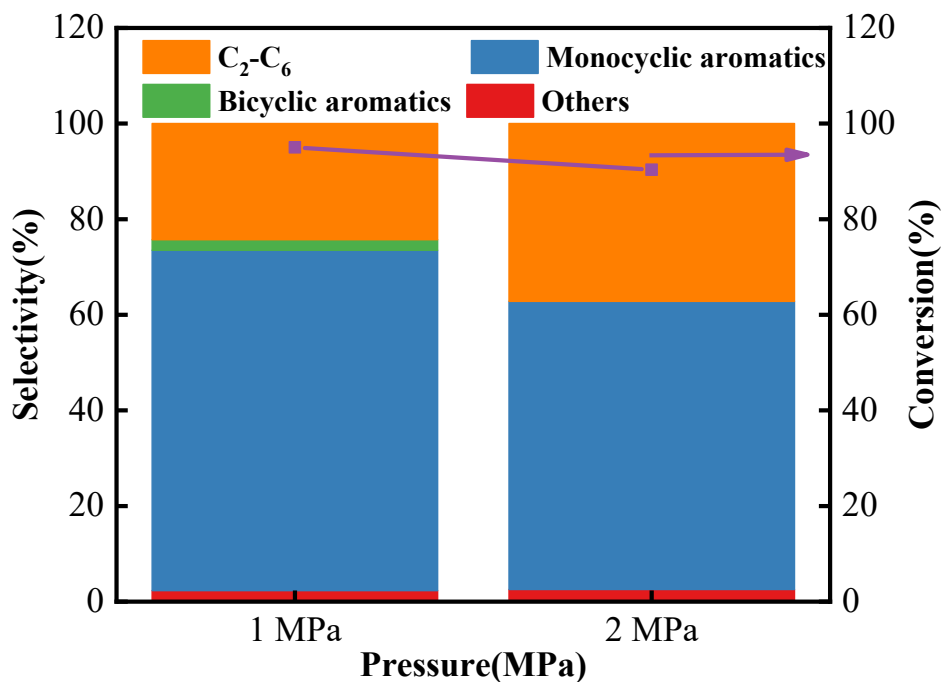

**Fig. S17** The conversion of n-hexane and the selectivity of total products in the aromatization of n-hexane over Ni-Pt@ZSM-5(25) under different pressure. (Reaction conditions :  $m(\text{Catalysts})=0.2\text{ g}$ ;  $p=1.0\text{ MPa}$ ;  $m(n\text{-hexane})=15\text{ g}$ ;  $t=60\text{ min}$ ;  $T=400\text{ }^{\circ}\text{C}$ ;  $C_{\text{cyc}}$ ——

cycloalkanes; n-C<sub>n</sub>—n-alkanes; n-C<sub>n</sub>—iso- alkanes)

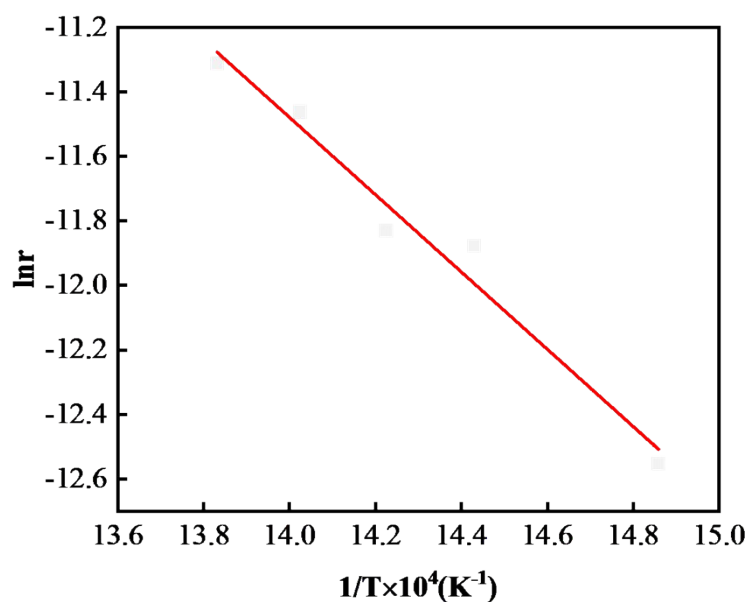

**Fig. S18.** Arrhenius plots of  $\ln r$  vs.  $1/T$  for methane over Ni-Pt@ZSM-5 (25).

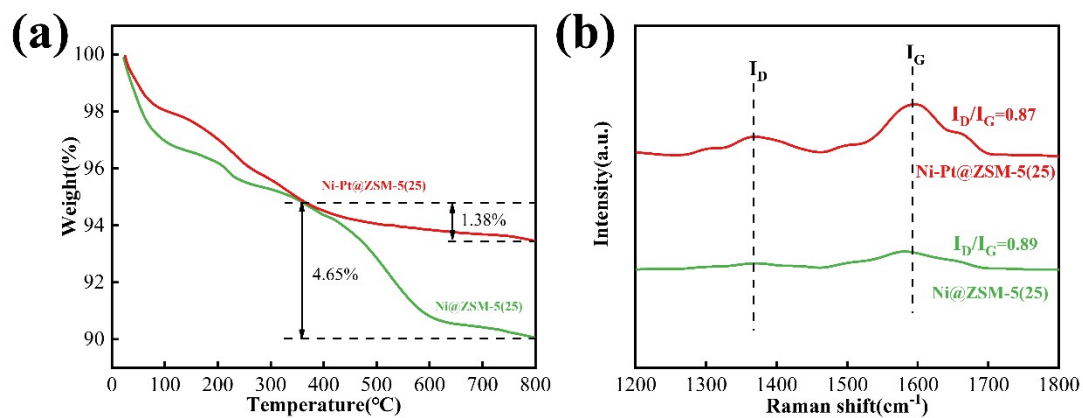

**Fig. S19** (a) TG profiles and (b) Raman spectra of spent catalysts in the co-aromatization

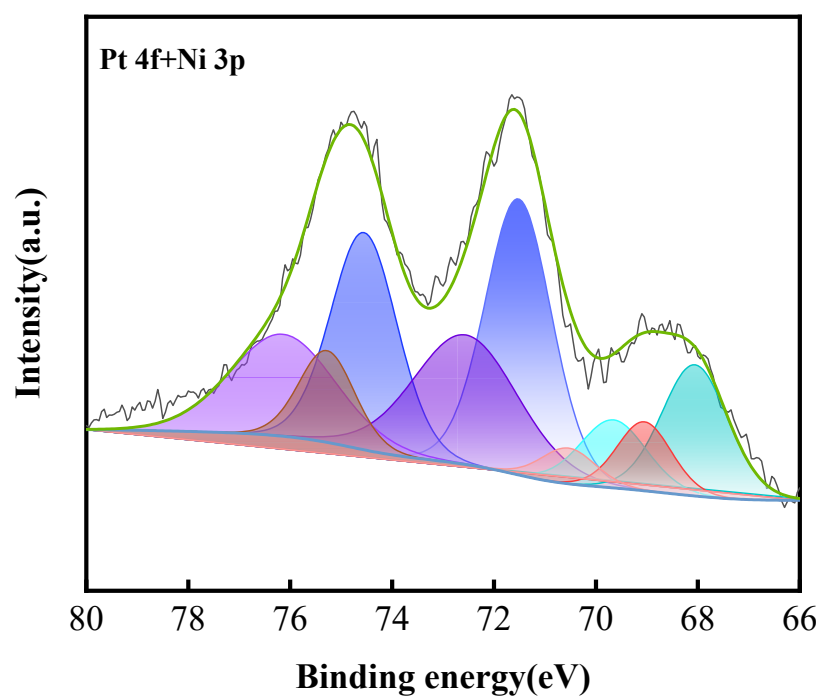

**Fig. S20** Pt 4f spectrum of the spent Ni-Pt@ZSM-5(25).

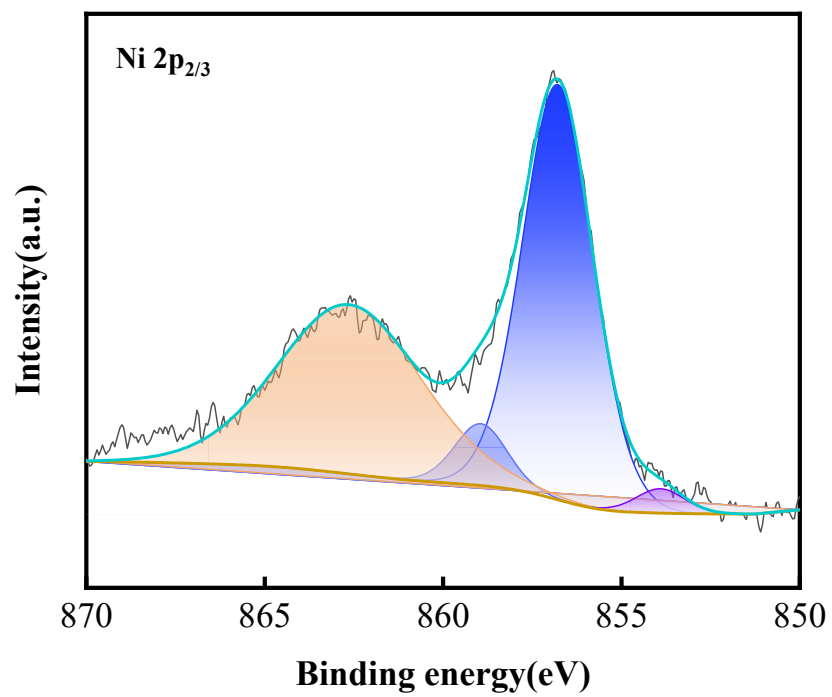

**Fig. S21** Ni 2p spectrum of the spent Ni-Pt@ZSM-5(25).

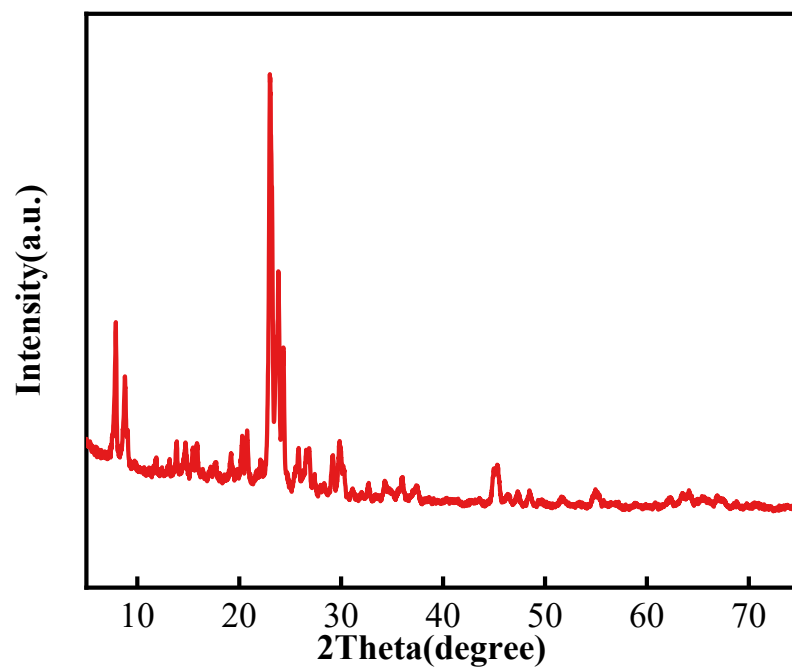

**Fig. S22** XRD of the spent Ni-Pt@ZSM-5(25).

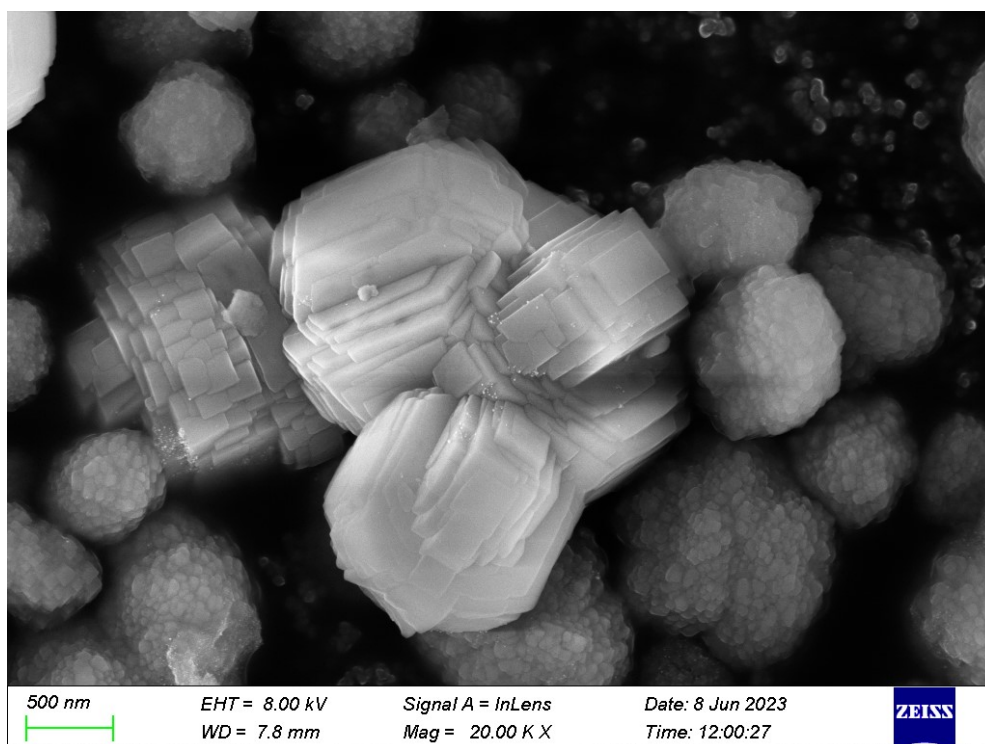

**Fig. S23** SEM of the spent Ni-Pt@ZSM-5(25).



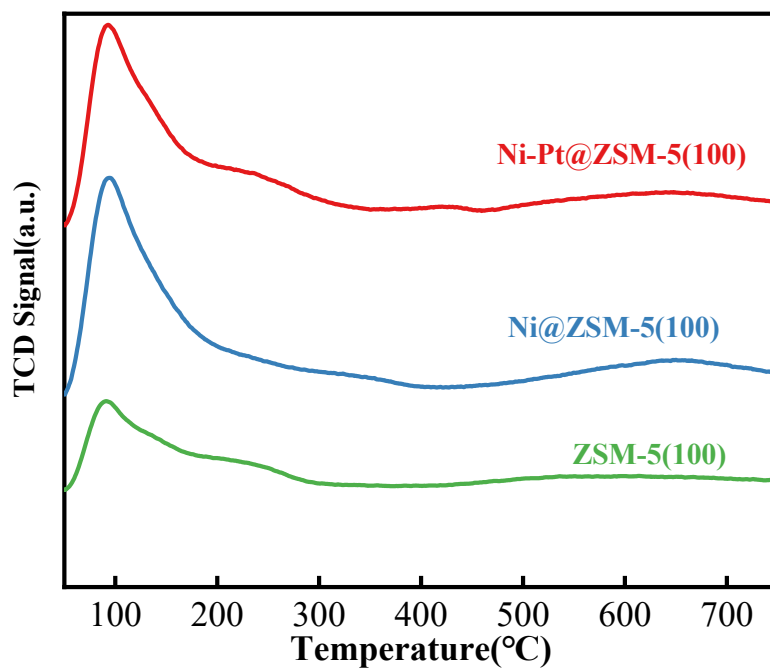

**Fig. S24**  $\text{NH}_3$ -TPD of as-prepared catalysts.

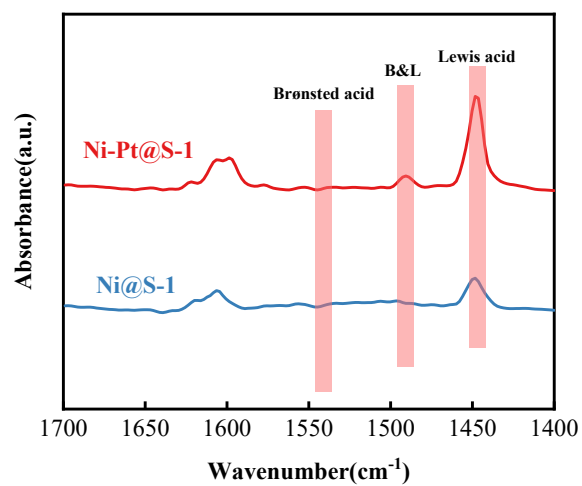

**Fig. 25** FT-IR spectra of pyridine adsorption of Ni-Pt@S-1 and Ni@S-1.

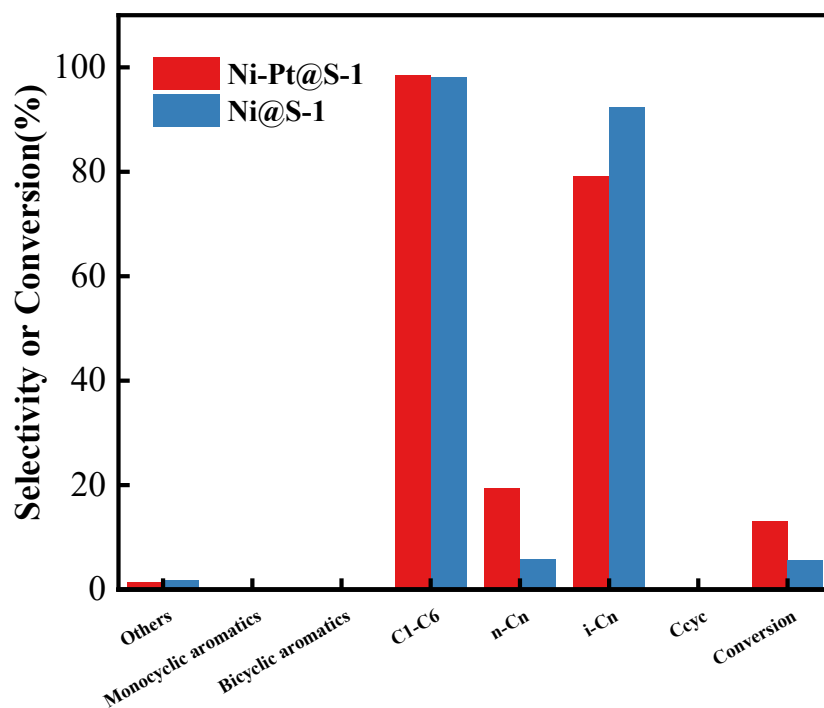

**Fig. S26** The aromatization of *n*-hexane performance of Ni-Pt@S-1 and Ni@S-1.

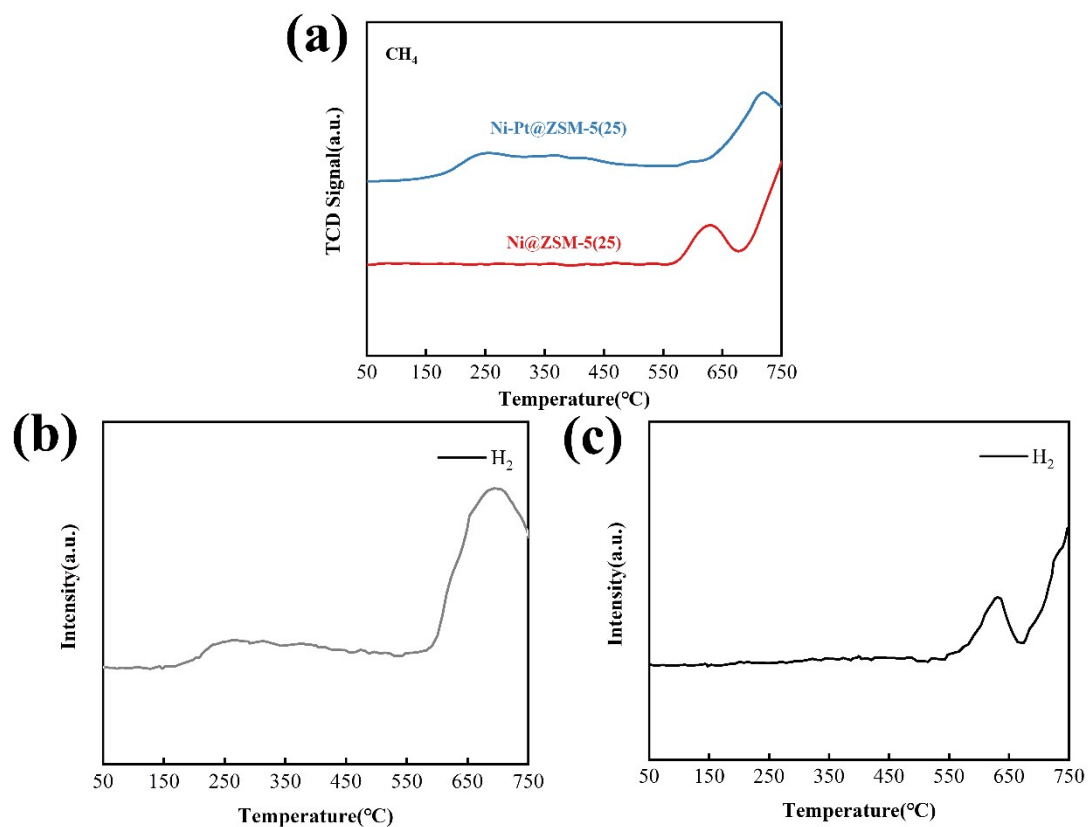

**Fig. S27** (a) CH<sub>4</sub> signals on the catalysts during TPRS and H<sub>2</sub> signals on Ni-Pt@ZSM-5(25) and Ni@ZSM-5(25).

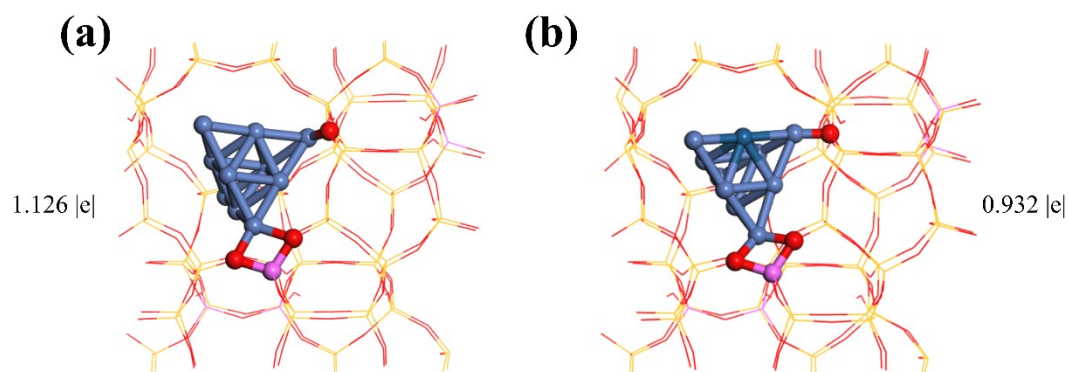

**Fig. S28** the optimized structural models of (a) Ni@ZSM-5 and (b) Ni-Pt@ZSM-5.

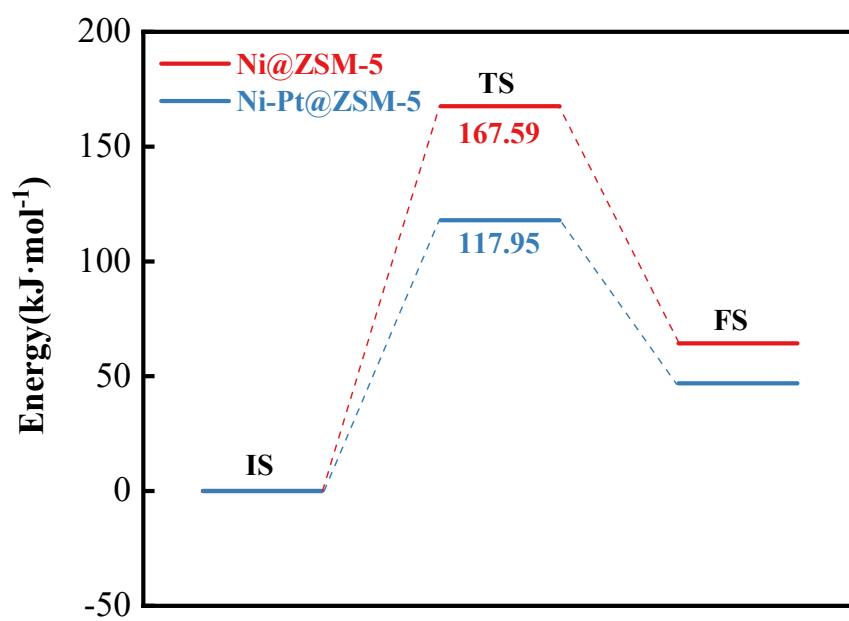

Fig. S29 Methane activation energy of different catalysts.

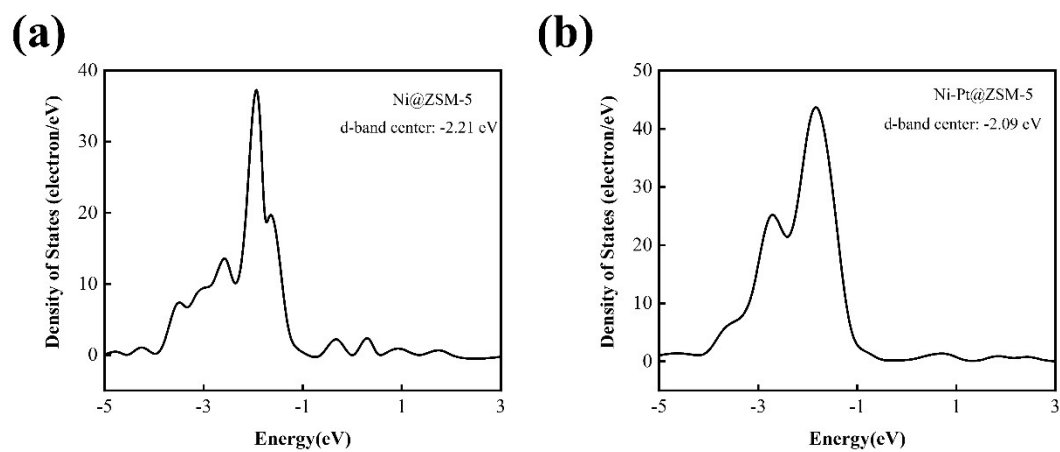

Fig. S30 D-band centers of (a) Ni@ZSM-5 and (b) Ni-Pt@ZSM-5.

**Table S1**

Metal content and dispersity for the prepared catalysts.

| Sample           | Pt loading <sup>a</sup> (wt%) | Ni loading <sup>a</sup> (wt%) | Dispersity <sup>b</sup> (%) |
|------------------|-------------------------------|-------------------------------|-----------------------------|
| Ni-Pt@ZSM-5(25)  | 0.43                          | 0.96                          | 28.6                        |
| Ni-Pt@ZSM-5(50)  | 0.37                          | 0.98                          | 27.9                        |
| Ni-Pt@ZSM-5(100) | 0.36                          | 1.03                          | 27.5                        |
| Ni-Pt@S-1        | 0.31                          | 1.07                          | 29.3                        |
| Ni@ZSM-5(25)     | -                             | 1.04                          | 25.6                        |
| Pt@ZSM-5(25)     | 0.32                          | -                             | 26.2                        |
| Ni-Pt/ZSM-5(25)  | 0.35                          | 1.06                          | 13.2                        |

<sup>a</sup> Measured by ICP-AES.

<sup>b</sup> Analyzed by CO pulse adsorption.

**Table S2**

Metal content and dispersity for the prepared catalysts.

| Sample          | Surface area ( $\text{m}^2 \cdot \text{g}^{-1}$ ) |                        |                       | Pore volume( $\text{cm}^3 \cdot \text{g}^{-1}$ ) |                        |          |
|-----------------|---------------------------------------------------|------------------------|-----------------------|--------------------------------------------------|------------------------|----------|
|                 | Total <sup>a</sup>                                | Micropore <sup>b</sup> | External <sup>b</sup> | Total <sup>c</sup>                               | Micropore <sup>b</sup> | Mesopore |
| Ni-Pt@ZSM-5(25) | 408.302                                           | 330.486                | 77.816                | 0.227                                            | 0.139                  | 0.088    |
| Ni-Pt@S-1       | 410.386                                           | 297.879                | 112.507               | 0.249                                            | 0.136                  | 0.113    |
| Pt@ZSM-5(25)    | 436.169                                           | 365.593                | 70.576                | 0.241                                            | 0.152                  | 0.089    |
| Ni-Pt/ZSM-5(25) | 396.381                                           | 243.553                | 152.828               | 0.236                                            | 0.098                  | 0.138    |
| ZSM-5(25)       | 420.219                                           | 154.511                | 265.708               | 0.236                                            | 0.106                  | 0.130    |

<sup>a</sup>Total surface area calculated using BET method.

<sup>b</sup>Micropore surface area, external surface area and micropore pore volume calculated using the adsorbed volume at the relative pressure ( $P/P_0$ ) of 0.99.

<sup>c</sup>Total pore volume confirmed by t-plot method.

**Table S3**

Cell parameters of the prepared catalysts

| Sample             | a/Å     | b/Å     | c/Å     | Å <sup>3</sup> |
|--------------------|---------|---------|---------|----------------|
| Ni-Pt@S-1          | 18.6499 | 19.7512 | 13.4389 | 4950.33        |
| Ni@ZSM-5(25)       | 19.8520 | 19.7665 | 13.4054 | 5260.34        |
| Pt@ZSM-5(25)       | 19.4653 | 19.8912 | 13.3264 | 5159.82        |
| Ni-Pt/ZSM-5(25)    | 18.8605 | 19.7609 | 13.3682 | 4982.33        |
| Ni-Pt@ZSM-5(25)    | 18.8426 | 19.7811 | 13.4349 | 5007.55        |
| Ni-Pt@ZSM-5(50)    | 18.5378 | 19.6876 | 13.4285 | 4900.93        |
| Ni-Pt@ZSM-5(100)   | 19.0953 | 19.7131 | 13.2405 | 4984.09        |
| ZSM-5 <sup>a</sup> | 20.104  | 19.897  | 13.395  | 5358.12        |

<sup>a</sup>Obtained from the standard PDF card (JCPDS No 40-0003).



**Table S4**

Results obtained by quantitative NMR analyses

| Sample          | $n_{\text{Si}}^{\text{a}}$<br>(mmol/g) | $n_{\text{Al}}^{\text{a}}$<br>(mmol/g) | $n_{\text{Pt}}^{\text{a}}$<br>(mmol/g) | $n_{\text{Ni}}^{\text{a}}$<br>(mmol/g) | $n_{\text{Si}(\text{OSi})_3(\text{OM})}$<br>) <sup>b</sup><br>(mmol/g) | $n_{\text{Si}(\text{OSi})_4}^{\text{b}}$<br>(mmol/g) | $(n_{\text{Si}(\text{OSi})_3(\text{ONi})} + n_{\text{Si}(\text{OSi})_3(\text{OPt})}) / (n_{\text{Ni}} + n_{\text{Pt}})$ |
|-----------------|----------------------------------------|----------------------------------------|----------------------------------------|----------------------------------------|------------------------------------------------------------------------|------------------------------------------------------|-------------------------------------------------------------------------------------------------------------------------|
| Ni-Pt@S-1       | 5.72                                   | 0                                      | 0.016                                  | 0.182                                  | 0.603                                                                  | 5.117                                                | 3.05                                                                                                                    |
| Ni-Pt@ZSM-5(25) | 5.76                                   | 0.22                                   | 0.017                                  | 0.180                                  | 1.122                                                                  | 4.638                                                | 1.23                                                                                                                    |

<sup>a</sup>Analyzed by ICP-AES;<sup>b</sup> $n_{\text{Si}} = n_{\text{Si}(\text{OSi})_3(\text{OM})} + n_{\text{Si}(\text{OSi})_4}$ ;  $n_{\text{Si}(\text{OSi})_3(\text{OM})} = n_{\text{Si}(\text{OSi})_3(\text{OAl})} + n_{\text{Si}(\text{OSi})_3(\text{ONi})} + n_{\text{Si}(\text{OSi})_3(\text{OPt})}$ ;  $n_{\text{Si}(\text{OSi})_3(\text{OAl})} =$  $4 * n_{\text{Al}}$

**Table S5. Co-aromatization performance of the as-prepared samples compared with other related catalysts**

| Catalyst        | Reactant                                        | Reaction condition                                                                                                                                                                                                                                                                                                                              | Methane conversion(%) | Aromatics selectivity(%) | Ref.      |
|-----------------|-------------------------------------------------|-------------------------------------------------------------------------------------------------------------------------------------------------------------------------------------------------------------------------------------------------------------------------------------------------------------------------------------------------|-----------------------|--------------------------|-----------|
| Zn/ZSM-5        | CH <sub>4</sub> +CH <sub>3</sub> OH             | m(catalysts)=2.0 g; T = 450 °C, molar ratio of CH <sub>3</sub> OH to CH <sub>4</sub> = 0.4 ± 0.03, WHSV <sub>CH<sub>3</sub>OH</sub> = 1.0 h <sup>-1</sup> , keep the WHSV <sub>CH<sub>3</sub>OH</sub> in CH <sub>3</sub> OH feed and CH <sub>3</sub> OH cofeed with CH <sub>4</sub> constant, TOS = 20 min                                      | 14.8                  | 56.86                    | [1]       |
| Mo/ZSM-5        | CH <sub>4</sub> +CH <sub>3</sub> OH             | T = 700 °C, P = 0.1 MPa, and GHSV = 2000 mL (CH <sub>4</sub> )/(gcat h)                                                                                                                                                                                                                                                                         | 26.4                  | 91.2                     | [2]       |
| Zn/ZSM-5        | CH <sub>4</sub> + phenol                        | m(catalysts)=1.0 g; m(phenol)=0.1 g; P=2 MPa; T = 400 °C; Time on stream = 60 min                                                                                                                                                                                                                                                               | 4.8                   | 62.9                     | [3]       |
| Ga-Ce-Pt/ZSM-5  | CH <sub>4</sub> + oleic acid                    | m(catalysts) : m(acetic acid)=0.3 : 1; P=30bar; T = 400 °C; Time on stream = 40 min                                                                                                                                                                                                                                                             | 3.2                   | 50.8                     | [4]       |
| Zn-Ga/ZSM-5     | CH <sub>4</sub> + acetic acid                   | m(catalysts)=1.0 g; m(acetic acid)=3.0 g; P=0.5 MPa; T = 400 °C; Time on stream = 40 min                                                                                                                                                                                                                                                        | <10%                  | ——                       | [5]       |
| 0.8KPtSn@ MFI   | CH <sub>4</sub> +C <sub>6</sub> H <sub>14</sub> | Feed (molar ratio): CH <sub>4</sub> :N <sub>2</sub> = 18: 5; C <sub>6</sub> H <sub>14</sub> :N <sub>2</sub> = 3:20; CH <sub>4</sub> :C <sub>6</sub> H <sub>14</sub> :N <sub>2</sub> = 18:3:2; 271 WHSV(CH <sub>4</sub> ) = 8 h <sup>-1</sup> ; WHSV(C <sub>6</sub> H <sub>14</sub> ) = 7 h <sup>-1</sup> ; T = 600 °C; Time on stream = 120 min | 7.4                   | 82.0                     | [6]       |
| Ni-Pt@ZSM-5(25) | CH <sub>4</sub> +C <sub>6</sub> H <sub>14</sub> | m(catalysts)=0.2 g; m(C <sub>6</sub> H <sub>14</sub> )=15 g; P=1.0 MPa; T = 450 °C; Time on stream = 60 min                                                                                                                                                                                                                                     | 10.89                 | 73.40                    | This work |

**Table S6** The kinetic data of methane and n-hexane.

| Temperature/K | Methane<br>conversion/% | $1/T \cdot 10^4 \text{K}^{-1}$ | $\ln r$   |
|---------------|-------------------------|--------------------------------|-----------|
| 673           | 3.15                    | 14.85884                       | -12.5528  |
| 693           | 6.19                    | 14.43001                       | -11.87726 |
| 703           | 6.48                    | 14.22475                       | -11.83148 |
| 713           | 9.37                    | 14.02525                       | -11.46269 |
| 723           | 10.89                   | 13.83126                       | -11.31235 |

**Table S7**

Adsorption energy of methane adsorbed on different catalysts.

| Model       | $E_T/\text{Ha}$ | $E_{\text{CH}_4}/\text{Ha}$ | $E_{T-\text{CH}_4}/\text{Ha}$ | $E_{\text{ads}}/\text{kJ} \cdot \text{mol}^{-1}$ |
|-------------|-----------------|-----------------------------|-------------------------------|--------------------------------------------------|
| Ni@ZSM-5    | -46671.571      | -40.457                     | -46712.104                    | -199.538                                         |
| Ni-Pt@ZSM-5 | -62501.308      | -40.457                     | -62541.814                    | -128.650                                         |

**Table S8**

Results of co-reaction of hexene and methane

| Temperature<br>(°C) | Reactants                               | Methane<br>conversion (%) | Selectivity of<br>aromatics<br>(%) |
|---------------------|-----------------------------------------|---------------------------|------------------------------------|
| 350                 | $\text{C}_6\text{H}_{12}$               | 0                         | 25.63                              |
|                     | $\text{CH}_4 + \text{C}_6\text{H}_{12}$ | 1.28                      | 0                                  |
| 400                 | $\text{C}_6\text{H}_{12}$               | 0                         | 33.28                              |

|     |                                                 |      |       |
|-----|-------------------------------------------------|------|-------|
| 450 | CH <sub>4</sub> +C <sub>6</sub> H <sub>12</sub> | 3.87 | 30.28 |
|     | C <sub>6</sub> H <sub>12</sub>                  | 0    | 45.97 |
|     | CH <sub>4</sub> +C <sub>6</sub> H <sub>12</sub> | 5.43 | 47.42 |

Reaction conditions :  $m(\text{Catalysts})=0.2$  g;  $p=1.0$  MPa;  $m(n\text{-hexene})=15$  g;  $t=60$  min

**Table S9**

Results of co-reaction of benzene and methane

| Temperature<br>(°C) | Methane conversion (%) | Selectivity of<br>toluene<br>(%) | Selectivity of<br>coke<br>(%) |
|---------------------|------------------------|----------------------------------|-------------------------------|
| 350                 | 0                      | 0                                | 100                           |
| 400                 | 0                      | 0                                | 100                           |
| 450                 | 0.13                   | 0.88                             | 99.12                         |

Reaction conditions :  $m(\text{Catalysts})=0.2$  g;  $p=1.0$  MPa;  $m(\text{benzene})=15$  g;  $t=60$  min

## References

- [1] Z. X. Xi, B. J. Zhou, B. B. Jiang, J. D. Wang, Z. W. Liao, Z. L. Huang, Y. R. Yang, Efficient conversion of methane to aromatics in the presence of methanol at low temperature, *Molecular Catalysis*, 2019, 475, 110493.
- [2] Y. Liu, D. F. Li, T. Y. Wang, Y. Liu, T. Xu, Y. Zhang, Efficient Conversion of Methane to Aromatics by Coupling Methylation Reaction, *ACS Catalysis*, 2016, 6(8), 5366-5370.
- [3] A. Wang, D. Austin, P. He, M. Ha, V. K. Michaelis, L. J. Liu, H. Qian, H. B. Zeng, H. Song, Mechanistic Investigation on Catalytic Deoxygenation of Phenol as a Model Compound of Biocrude Under Methane, *ACS Sustainable Chemistry & Engineering*, 2019, 7(1), 1512-1523.
- [4] J. S. Jarvis, Z. F. Li, S. J. Meng, H. Song, Methane assisted catalyst synthesis and catalytic conversion of oleic acid, *Journal of Materials Chemistry A*, 2022, 10(36), 18671-18678.
- [5] A. G. Wang, D. Austin, A. Karmakar, G. M. Bernard, V. K. Michaelis, M. M. Yung, H. B. Zeng, H. Song, Methane Upgrading of Acetic Acid as a Model Compound for a Biomass-Derived Liquid over a Modified Zeolite Catalyst, *ACS Catalysis*, 2017, 7(5), 3681-3692.
- [6] B. Liu, F. Wang, X. M. Dou, P. F. Li, H. W. Xiang, Y. Yang, P. He, Co-aromatization of methane and hexane over Pt encapsulated in ZSM-5 zeolite and the electronic effect of K promoters, *Science China-Chemistry*, 2024, 67(3), 1017-1027.
